# Supplementary material for: Synthesis of mesoporous Fe/N/C oxygen reduction catalysts through NaCl crystallite-confined pyrolysis of polyvinylpyrrolidone
Source: Royal Society of Chemistry journal article supplement (doi:10.1039/c6ta05075a), 2016-01-01
Supplement: c6ta05075a1.pdf [file c6ta05075a1.pdf]

## Electronic Supplementary Information

### Mesoporous Fe/N/C oxygen reduction catalyst through NaCl crystallites-confined pyrolysis of polyvinylpyrrolidone

Wang Wang,<sup>a</sup> Jin Luo,<sup>a</sup> Huiwen Chen,<sup>a</sup> Jun Li,<sup>a</sup> Wei Xing,<sup>b</sup> Shengli Chen,<sup>a,\*</sup>

<sup>a</sup>Hubei Electrochemical Power Sources Key Laboratory, Department of Chemistry, Wuhan University, Wuhan 430072, China. Tel./Fax: (+86) 27 6875 4693; \*E-mail: [slchen@whu.edu.cn](mailto:slchen@whu.edu.cn)

<sup>b</sup>State Key Laboratory of Electroanalytical Chemistry, Changchun Institute of Applied Chemistry, Chinese Academy of Sciences, Changchun, Jilin, 130022, China.

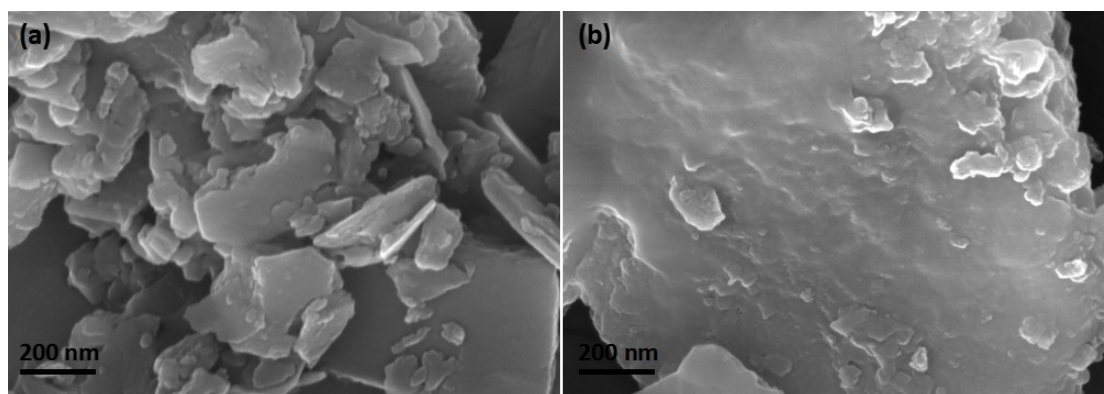

Fig. S1. SEM images of PVP-NaCl-Fe/N/C (a) and PVP-Fe/N/C (b).

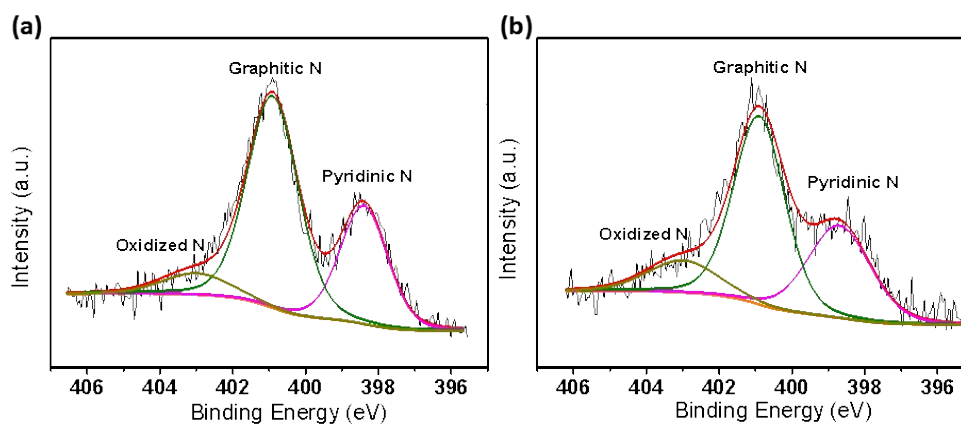

Fig. S2. XPS spectra of N 1s in PVP-NaCl-Fe/N/C (a) and PVP-Fe/N/C (b).

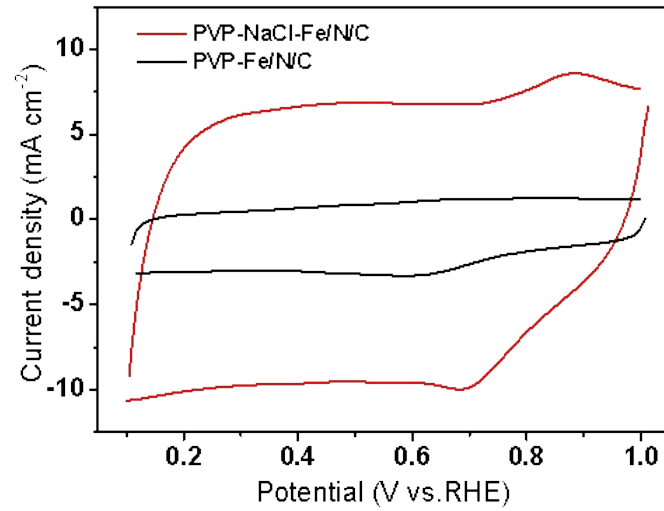

Fig. S3. CV of PVP-Fe/N/C and PVP-NaCl-Fe/N/C in O<sub>2</sub>-saturated 0.1 M HClO<sub>4</sub>. Scan rate: 100 mV s<sup>-1</sup>.

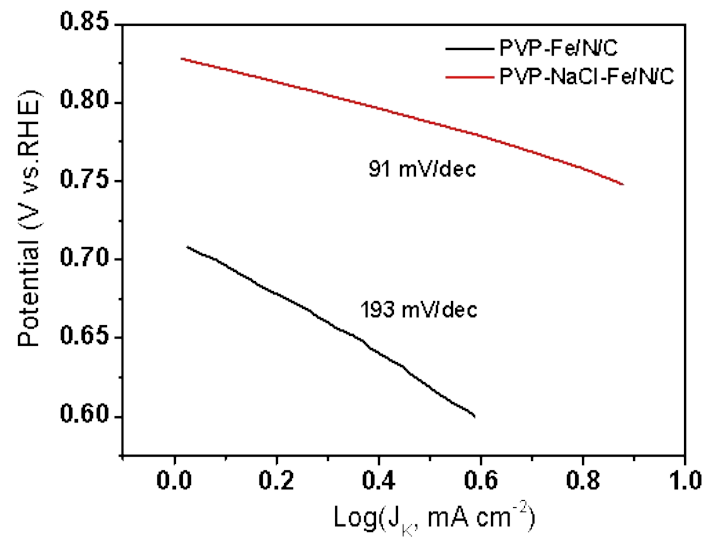

Fig. S4. Tafel plots of kinetic current for PVP-Fe/N/C and PVP-NaCl-Fe/N/C.

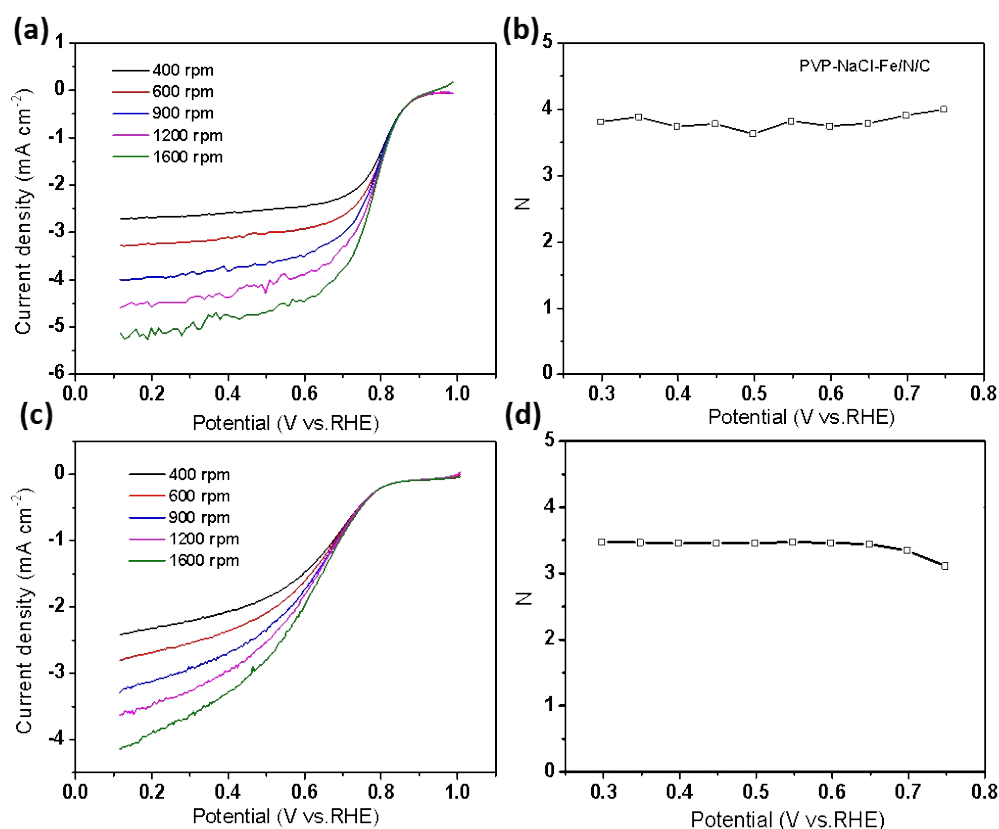

Fig. S5. (a) ORR polarization curves of PVP-NaCl-Fe/N/C in  $O_2$ -saturated 0.1 M  $HClO_4$  at various rotating speeds. Scan rate:  $5 \text{ mV s}^{-1}$ . (b) The number of electron transferred for ORR on PVP-NaCl-Fe/N/C calculated from the K-L equation. (c) ORR polarization curves of PVP-Fe/N/C in  $O_2$ -saturated 0.1 M  $HClO_4$  at various rotating speeds. Scan rate:  $5 \text{ mV s}^{-1}$ . (d) The number of electron transferred for ORR on PVP-Fe/N/C calculated from the K-L equation.

Table S1. RDE performance comparison of non-precious metal catalysts for ORR.

| Catalysts              | Catalyst loading/ $\mu\text{g cm}^{-2}$ | $E_{1/2}$ in acidic media (V vs. RHE) | $E_{1/2}$ in alkaline media (V vs. RHE) | Ref.      |
|------------------------|-----------------------------------------|---------------------------------------|-----------------------------------------|-----------|
| <b>PVP-NaCl-Fe/N/C</b> | <b>500</b>                              | <b>0.793</b>                          | <b>0.878</b>                            | This work |
| CNT/(N-C)-800          | 500                                     | -                                     | 0.848                                   | 1         |
| C-N-Co                 | 600                                     | 0.79                                  | -                                       | 2         |
| NP-HPC                 | 200                                     | -                                     | 0.83                                    | 3         |
| FePPyC-900             | 400                                     | 0.740                                 | 0.877                                   | 4         |
| Fe-N-CC                | 100                                     | $\sim 0.60$                           | 0.83                                    | 5         |
| Co-N-C                 | 283 (alkaline),<br>600 (acid)           | 0.761                                 | 0.841                                   | 6         |

### Reference for Table S1

1. J.-C. Li, S.-Y. Zhao, P.-X. Hou, R.-P. Fang, C. Liu, J. Liang, J. Luan, X.-Y. Shan and H.-M. Cheng, *Nanoscale*, 2015, **7**, 19201-19206.
2. H.-W. Liang, W. Wei, Z.-S. Wu, X. Feng and K. Müllen, *J. Am. Chem. Soc.*, 2013, **135**, 16002-16005.
3. Y.-P. Zhu, Y. Liu, Y.-P. Liu, T.-Z. Ren, G.-H. Du, T. Chen and Z.-Y. Yuan, *J. Mater. Chem. A*, 2015, **3**, 11725-11729.
4. T.-N. Tran, M. Y. Song, K. P. Singh, D.-S. Yang and J.-S. Yu, *J. Mater. Chem. A*, 2016, **4**, 8645-8657.
5. G. A. Ferrero, K. Preuss, A. Marinovic, A. B. Jorge, N. Mansor, D. J. L. Brett, A. B. Fuertes, M. Sevilla and M.-M. Titirici, *ACS Nano*, 2016.
6. B. You, N. Jiang, M. Sheng, W. S. Drisdell, J. Yano and Y. Sun, *ACS Catal*, 2015, **5**, 7068-7076.
